# Supplementary material for: Solutions of fully exfoliated individual graphene flakes in low boiling point solvents
Source: Royal Society of Chemistry journal article supplement (doi:10.1039/c2sm25960e), 2012-01-01
Supplement: c2sm25960e.pdf [file c2sm25960e.pdf]

## Solutions of Fully Exfoliated Individual Graphene Flakes in Low Boiling Point Solvents.

Amélie Catheline et al.

### Supplementary information:

#### X-ray diffraction diagram of KC<sub>8</sub>.

To verify the correct synthesis of KC<sub>8</sub>, beyond the already very informative color change (greyish to golden shine), an X-ray powder diffraction diagram of the synthesized KC<sub>8</sub> was performed. (Figure S1). On figure 1, one can observe the full disappearance of the 002 graphitic peak, corresponding to a interlayer distance of 3.35 Å, replaced by a new peak, at lower wavevector, corresponding to the interlayer distance of KC<sub>8</sub>, 5.43 Å.

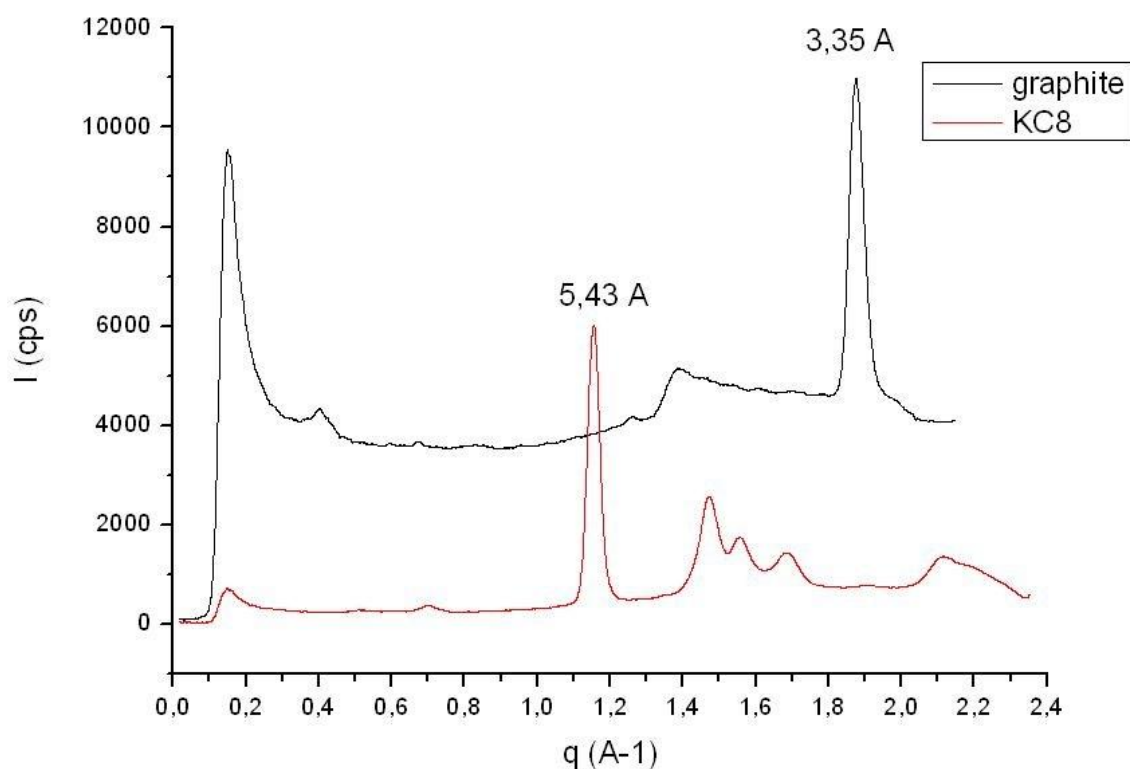

Figure S1. X-ray powder diffraction diagram of the as-synthesized KC<sub>8</sub> compound, sealed under Ar atmosphere in a Lindeman capillary. (Cu K $\alpha$  radiation,  $\lambda$  = 1.54 Å)
